# Supplementary material for: Race, Ethnicity, and Delayed Time to COVID-19 Testing Among US Health Care Workers
Source: PubMed Central journal article supplement (PMC11007575; doi:10.1001/jamanetworkopen.2024.5697), 2024-04-10
Supplement: jamanetwopen-e245697-s001.pdf [file jamanetwopen-e245697-s001.pdf]

## Supplemental Online Content

Baymon DE, Vakkalanka JP, Krishnadasan A, et al; For the Preventing Emerging Infections through Vaccine Effectiveness Testing (PREVENT) project. Race, ethnicity, and delayed time to COVID-19 testing among US health care workers. *JAMA Netw Open*. 2024;7(4):e245697. doi:10.1001/jamanetworkopen.2024.5697

**eFigure.** Histogram of Time to COVID-19 Testing From Symptom Onset

**eTable.** Association Between Demographic Characteristics and Delayed Testing

This supplemental material has been provided by the authors to give readers additional information about their work.

**eFigure. Histogram of Time To COVID-19 Testing From Symptom Onset**

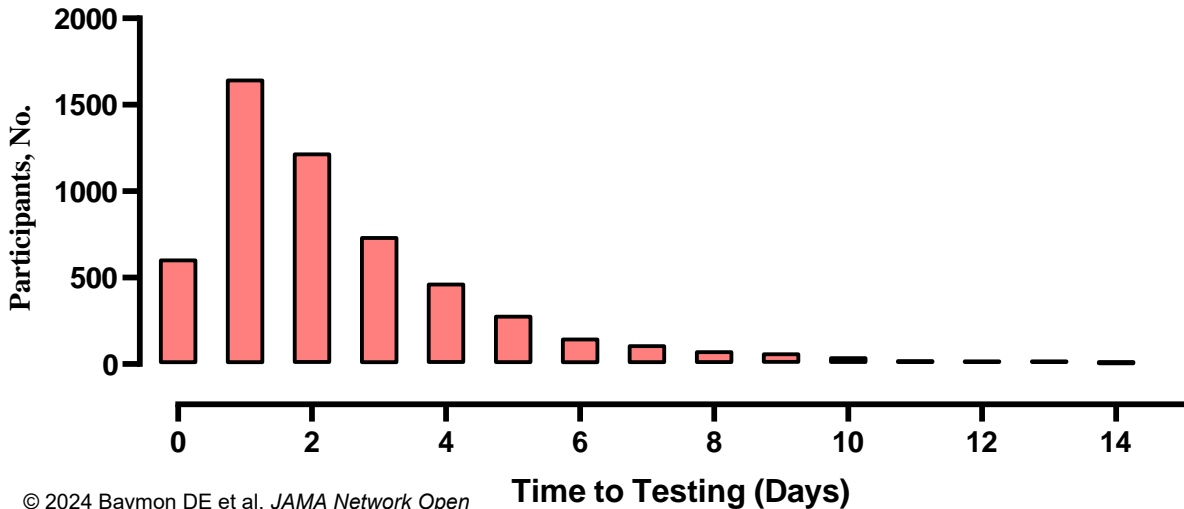

**eTable. Association Between Demographic Characteristics and Delayed Testing<sup>1</sup>**

| <b>Individual - Demographic</b>                                           | <b>aRR (95% CI)</b> |
|---------------------------------------------------------------------------|---------------------|
| <b>Sex (Ref = Female)</b>                                                 |                     |
| Male                                                                      | 1.00 (0.94-1.06)    |
| <b>Age Group (Years) (Ref = 18-49 years)</b>                              |                     |
| 25-34                                                                     | 0.99 (0.92-1.06)    |
| 35-49                                                                     | 0.97 (0.88-1.07)    |
| 50-64                                                                     | 1.08 (0.99-1.18)    |
| <b>Race and Ethnicity (Ref = Non-Hispanic White)</b>                      |                     |
| Non-Hispanic Black                                                        | 1.18 (1.10-1.27)    |
| Non-Hispanic Asian                                                        | 1.04 (0.89-1.22)    |
| Non-Hispanic Other                                                        | 1.17 (1.03-1.33)    |
| Hispanic - White                                                          | 1.03 (0.87-1.22)    |
| Hispanic - Other                                                          | 1.16 (0.99-1.36)    |
| Other                                                                     | 0.58 (0.42-0.80)    |
| <b>Job and Education Classification (Ref = Clinical, Graduate Degree)</b> |                     |
| Clinical - Some College/College/Technical                                 | 1.25 (1.11-1.40)    |
| Non-Clinical - Graduate Degree                                            | 1.17 (1.03-1.32)    |
| Non-Clinical - Some College/College/Technical                             | 1.26 (1.13-1.41)    |
| High school or Less                                                       | 1.36 (1.09-1.69)    |
| Unknown                                                                   | 1.06 (0.16-6.93)    |
| <b>Clinical Characteristics</b>                                           |                     |
| ≥3 comorbidities total (Ref = ≤2 comorbidities)                           | 1.18 (1.10-1.27)    |
| Asthma (Ref = No)                                                         | 1.07 (1.01-1.15)    |
| Diabetes (Type I or II) (Ref = No)                                        | 0.86 (0.73-1.02)    |
| Hypertension (Ref = No)                                                   | 0.96 (0.86-1.07)    |
| <b>Smoking Status (Ref = Never smoked)</b>                                |                     |
| Current smoker                                                            | 0.99 (0.85-1.15)    |
| Former smoker                                                             | 0.96 (0.85-1.07)    |
| Prefer not to answer                                                      | 1.26 (1.14-1.40)    |
| <b>COVID-19 Characteristics</b>                                           |                     |
| <b>Variant (Ref = Wild Type/Alpha)</b>                                    |                     |
| Delta                                                                     | 0.93 (0.85-1.02)    |
| Omicron                                                                   | 0.81 (0.72-0.91)    |
| <b>Vaccination (Ref = None)</b>                                           |                     |
| Yes, 2-dose                                                               | 0.99 (0.91-1.08)    |
| Incomplete                                                                | 0.91 (0.82-1.00)    |

<sup>1</sup> Also adjusted for study site (results not presented)
