# Supplementary material for: Race, Ethnicity, and Delayed Time to COVID-19 Testing Among US Health Care Workers
Source: PubMed Central journal article supplement (PMC11007575; doi:10.1001/jamanetworkopen.2024.5697), 2024-04-10
Supplement: jamanetwopen-e245697-s002.pdf [file jamanetwopen-e245697-s002.pdf]

## Supplemental Online Content: Nonauthor Collaborators

\*First name, last name, and suffix (if applicable) are required and will appear in PubMed.

| <b>*Group Name(s): PREVENT</b>           |                   |                              |                         |                    |                                                 |                                                                |                                                                                                   |
|------------------------------------------|-------------------|------------------------------|-------------------------|--------------------|-------------------------------------------------|----------------------------------------------------------------|---------------------------------------------------------------------------------------------------|
| <b>*First Name and Middle Initial(s)</b> | <b>*Last Name</b> | <b>*Suffix (eg, Jr, III)</b> | <b>Academic Degrees</b> | <b>Institution</b> | <b>Location (city, state/province, country)</b> | <b>Role or Contribution, eg, chair, principal investigator</b> | <b>Group (if more than 1 Group listed in the byline) and/or Subgroup (eg, Steering Committee)</b> |
| Howard A.                                | Smithline         |                              | MD, MS                  |                    |                                                 |                                                                |                                                                                                   |
| Lilly C.                                 | Lee               |                              | MD, SM                  |                    |                                                 |                                                                |                                                                                                   |
| Stephen C.                               | Lim               |                              | MD                      |                    |                                                 |                                                                |                                                                                                   |
| Gregory J.                               | Moran             |                              | MD                      |                    |                                                 |                                                                |                                                                                                   |
| Mark T.                                  | Steele            |                              | MD                      |                    |                                                 |                                                                |                                                                                                   |
| David G.                                 | Beiser            |                              | MD, MS                  |                    |                                                 |                                                                |                                                                                                   |
| Brett                                    | Faine             |                              | PharmD, MS              |                    |                                                 |                                                                |                                                                                                   |
| Utsav                                    | Nandi             |                              | MD MSCI                 |                    |                                                 |                                                                |                                                                                                   |
| Walter A.                                | Schrading         |                              | MD                      |                    |                                                 |                                                                |                                                                                                   |
| Brian                                    | Chinnock          |                              | MD                      |                    |                                                 |                                                                |                                                                                                   |
| Anne                                     | Chipman           |                              | MD, MS                  |                    |                                                 |                                                                |                                                                                                   |
| Megan                                    | Fuentes           |                              | BS                      |                    |                                                 |                                                                |                                                                                                   |
| Frank                                    | LoVecchio         |                              | DO, MPH                 |                    |                                                 |                                                                |                                                                                                   |
| Bradley                                  | Clinansmith       |                              | BS                      |                    |                                                 |                                                                |                                                                                                   |
| Shannon                                  | Landers           |                              | BA                      |                    |                                                 |                                                                |                                                                                                   |
| Alysia                                   | Horcher           |                              | MPAS, PA-C              |                    |                                                 |                                                                |                                                                                                   |
| Lisandra                                 | Uribe             |                              | BS                      |                    |                                                 |                                                                |                                                                                                   |
| Kavitha                                  | Pathmarajah       |                              | MPH                     |                    |                                                 |                                                                |                                                                                                   |
| Kye E.                                   | Poronsky          |                              | MS                      |                    |                                                 |                                                                |                                                                                                   |
| Dean M.                                  | Hashimoto         |                              | MD                      |                    |                                                 |                                                                |                                                                                                   |
| Monica                                   | Bahamon           |                              | MPH                     |                    |                                                 |                                                                |                                                                                                   |
| Michelle                                 | St. Romain        |                              | MD                      |                    |                                                 |                                                                |                                                                                                   |
| Efrat                                    | Kean              |                              | MD                      |                    |                                                 |                                                                |                                                                                                   |
| Elizabeth                                | Krebs             |                              | MD,MSc                  |                    |                                                 |                                                                |                                                                                                   |
| Amy                                      | Stubbs            |                              | MD                      |                    |                                                 |                                                                |                                                                                                   |
| Sara                                     | Roy               |                              | MSCR                    |                    |                                                 |                                                                |                                                                                                   |
| Gregory                                  | Volturo           |                              | MD                      |                    |                                                 |                                                                |                                                                                                   |
| Amanda                                   | Higgins           |                              | MS                      |                    |                                                 |                                                                |                                                                                                   |
| James                                    | Galbraith         |                              | MD                      |                    |                                                 |                                                                |                                                                                                   |
| James C.                                 | Crosby            |                              | MD                      |                    |                                                 |                                                                |                                                                                                   |
| Mary                                     | Mulrow            |                              | MA, MN                  |                    |                                                 |                                                                |                                                                                                   |
| Eva                                      | Gonzalez          |                              | BA                      |                    |                                                 |                                                                |                                                                                                   |
| Ryan                                     | Gierke            |                              | MPH                     |                    |                                                 |                                                                |                                                                                                   |

Supplemental Online Content: Nonauthor Collaborators

\*First name, last name, and suffix (if applicable) are required and will appear in PubMed.

| <b>*First Name and Middle Initial(s)</b> | <b>*Last Name</b> | <b>*Suffix (eg, Jr, III)</b> | Academic Degrees | Institution | Location (city, state/province, country) | Role or Contribution, eg, chair, principal investigator | Group (if more than 1 Group listed in the byline) and/or Subgroup (eg, Steering Committee) |
|------------------------------------------|-------------------|------------------------------|------------------|-------------|------------------------------------------|---------------------------------------------------------|--------------------------------------------------------------------------------------------|
| Jennifer L.                              | Farrar            |                              | MPH              |             |                                          |                                                         |                                                                                            |
| Wei                                      | Xing              |                              |                  |             |                                          |                                                         |                                                                                            |
| Yunmi                                    | Chung             |                              | MPH              |             |                                          |                                                         |                                                                                            |
| Anna                                     | Yousaf            |                              | MD               |             |                                          |                                                         |                                                                                            |
| Jennifer                                 | Onukwube Okaro    |                              | MPH              |             |                                          |                                                         |                                                                                            |
| Glen R.                                  | Abedi             |                              | MPH              |             |                                          |                                                         |                                                                                            |
| Sankan                                   | Nyanseor          |                              | MPH              |             |                                          |                                                         |                                                                                            |
| Christopher K.                           | Watts             |                              | MPH              |             |                                          |                                                         |                                                                                            |
