# Supplementary material for: Race, Ethnicity, and Delayed Time to COVID-19 Testing Among US Health Care Workers
Source: PubMed Central journal article supplement (PMC11007575; doi:10.1001/jamanetworkopen.2024.5697), 2024-04-10
Supplement: jamanetwopen-e245697-s003.pdf [file jamanetwopen-e245697-s003.pdf]

## Data Sharing Statement

Baymon. Race, Ethnicity, and Delayed Time to COVID-19 Testing Among US Health Care Workers. *JAMA Netw Open*. Published April 10, 2024.

doi:10.1001/jamanetworkopen.2024.5697

### Data

**Data available:** Yes

**Data types:** Deidentified participant data

**How to access data:** [dbaymon@mgb.org](mailto:dbaymon@mgb.org)

**When available:** With publication

### Supporting Documents

**Document types:** Informed consent form, Statistical/analytic code

**How to access documents:** [dbaymon@mgb.org](mailto:dbaymon@mgb.org)

**When available:** With publication

### Additional Information

**Who can access the data:** anyone requesting the data

**Types of analyses:** for alternative research analysis or statistical confirmation

**Mechanisms of data availability:** after approval of a proposal with a signed data access agreement and investigator support
